# Supplementary material for: C24:0 avoids cold exposure-induced oxidative stress and fatty acid β-oxidation damage
Source: PubMed Central journal article supplement — iScience. 2021 Nov 9;24(12):103409. doi: 10.1016/j.isci.2021.103409 (PMC8607208; doi:10.1016/j.isci.2021.103409), 2021-11-09
Supplement: mmc1.pdf [file mmc1.pdf]

iScience, Volume 24

## **Supplemental information**

**C24:0 avoids cold exposure-induced oxidative stress and fatty acid  $\beta$ -oxidation damage**

**Shouxiang Sun, Xiaojuan Cao, and Jian Gao**

## **C24:0 avoids cold exposure-induced oxidative stress and fatty acid $\beta$ -oxidation damage**

Shouxiang Sun<sup>1</sup>, Xiaojuan Cao<sup>1,2</sup>, Jian Gao<sup>1,2\*</sup>

<sup>1</sup>College of Fisheries, Key Lab of Freshwater Animal Breeding, Ministry of Agriculture, Huazhong Agricultural University, Wuhan 430070, China.

<sup>2</sup>College of Fisheries, Engineering Research Center of Green development for Conventional Aquatic Biological Industry in the Yangtze River Economic Belt, Ministry of Education/Hubei Provincial Engineering Laboratory for Pond Aquaculture, Huazhong Agricultural University, Wuhan 430070, China.

\*Corresponding author

TEL: 86(027)87282113. Email address: [gaojian@mail.hzau.edu.cn](mailto:gaojian@mail.hzau.edu.cn) (J. Gao)

Postal address: No.1 Shizishan Stress, Hongshan District, Wuhan 430070, Hubei Province, China

**Figure S1-S7**

**Table S1**

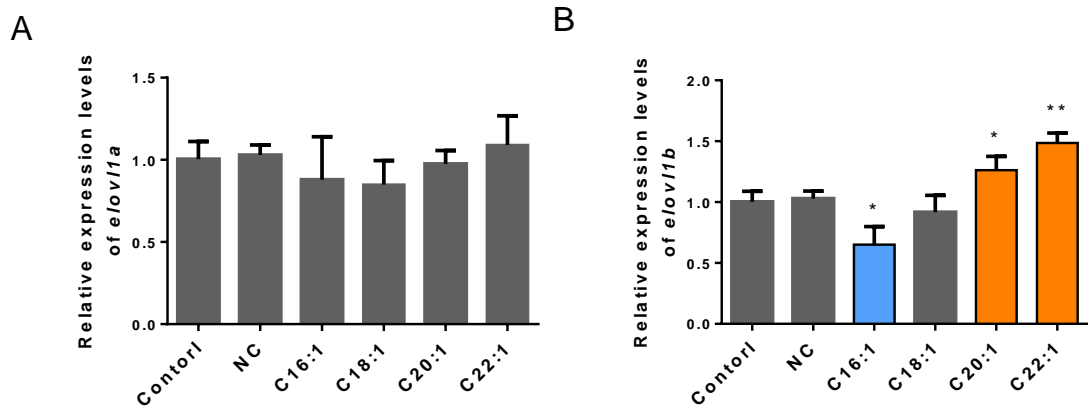

**Figure S1.** Expression levels of *elov11a* (A) and *elov11b* (B) in control and MUFA-treatment zebrafish liver (ZFL) cells at 28°C, related to Figure 1. The blue and orange color respectively meant significant decrease and increase in *elov11b* expression level of the treated groups, compared with the control group. Data were given as means  $\pm$  SD of 3 independent experiments. The statistical analyses were conducted by *T*-test. The asterisks labeled above the error bars indicated significant differences ( $*p < 0.05$ ,  $**p < 0.01$ ). MUFA, monounsaturated fatty acids; NC, negative control; elov11, fatty acyl elongase 1.

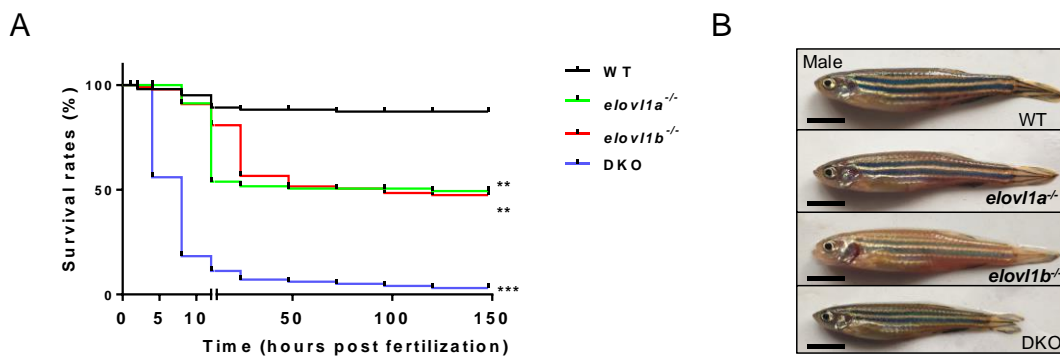

**Figure S2.** The early survival rates of WT, *elov11a*<sup>-/-</sup>, *elov11b*<sup>-/-</sup> and DKO zebrafish (A) and pictures of these four kinds of zebrafish of two-month-old (B), related to Figure 2. Scale bar=5mm. WT, wild-type zebrafish; elov11, fatty acyl elongase 1; *elov11a*<sup>-/-</sup>, *elov11a* knockout zebrafish; *elov11b*<sup>-/-</sup>, *elov11b* knockout zebrafish; DKO, double gene knockout zebrafish.

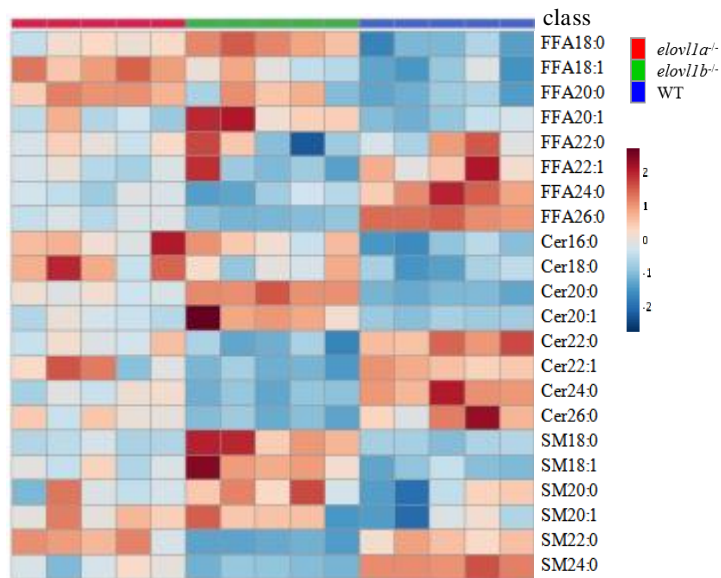

**Figure S3.** Heatmap of saturated and monounsaturated FFA, Cer and SM levels in livers of WT, *elov11a*<sup>-/-</sup> and *elov11b*<sup>-/-</sup> zebrafish, related to Figure 2. n=5. WT, wild-type zebrafish; *elov11*, fatty acyl elongase 1; *elov11a*<sup>-/-</sup>, *elov11a* knockout zebrafish; *elov11b*<sup>-/-</sup>, *elov11b* knockout zebrafish; FFA, free fatty acids; Cer, ceramide; SM, sphingomyelin.

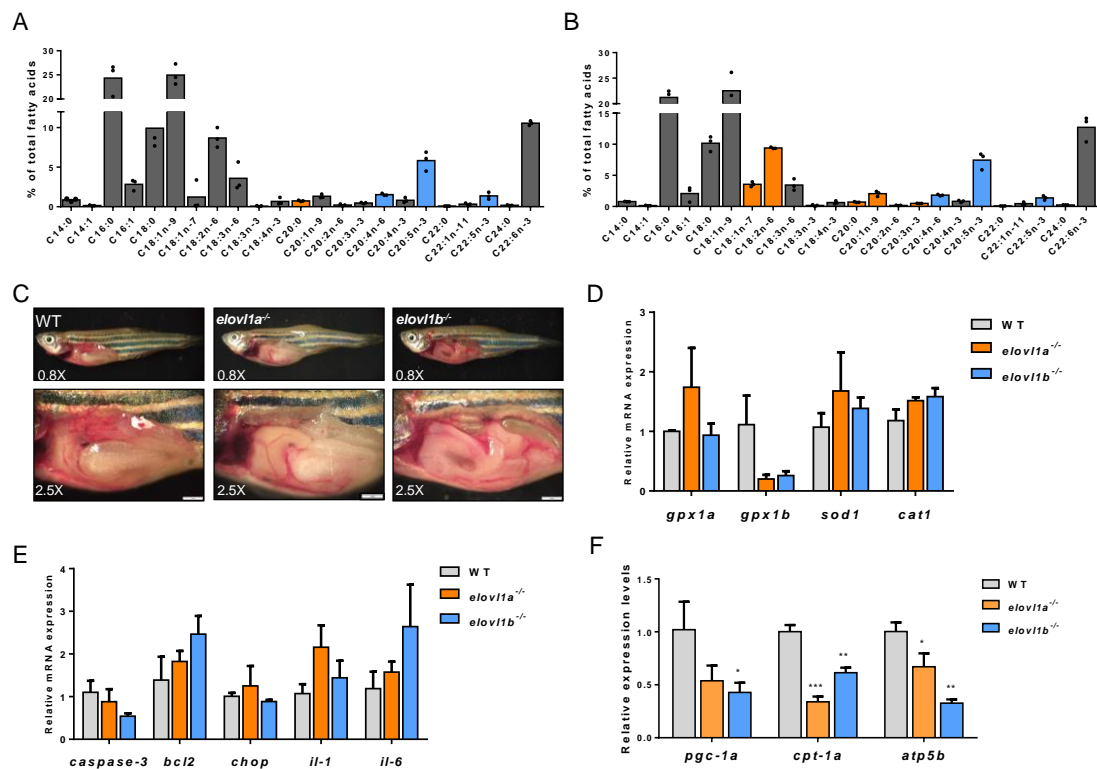

**Figure S4.** *elov11* deletion impairs the cold resistance of zebrafish. (A and B) Fatty acid compositions in livers of *elov11a*<sup>-/-</sup> (A) and *elov11b*<sup>-/-</sup> (B) zebrafish under cold stress, related to Figure 3. The blue and orange color in (A) and (B) respectively meant significant decrease and increase in parameters of *elov11a*<sup>-/-</sup>/*elov11b*<sup>-/-</sup> zebrafish, compared with WT zebrafish ( $p < 0.05$ ). (C) The liver lesions of WT, *elov11a*<sup>-/-</sup> and *elov11b*<sup>-/-</sup> zebrafish under cold stress, observed under light microscope. (D and E) The expression levels of antioxidant stress-related genes (D) and apoptosis-related genes and inflammation-related genes (E) in livers of WT, *elov11a*<sup>-/-</sup> and *elov11b*<sup>-/-</sup> zebrafish at 28°C. (F) The expression levels of  $\beta$ -oxidation-related genes in livers of WT, *elov11a*<sup>-/-</sup> and *elov11b*<sup>-/-</sup> zebrafish under cold stress.

Data were given as means  $\pm$  SD of 3 independent experiments. The statistical analyses were conducted by *T*-test. The asterisks labeled above the error bars indicated significant differences (\* $p < 0.05$ , \*\* $p < 0.01$ , \*\*\* $p < 0.001$ ). WT, wild-type zebrafish; *elov11*, fatty acyl elongase 1; *elov11a*<sup>-/-</sup>, *elov11a* knockout zebrafish; *elov11b*<sup>-/-</sup>, *elov11b* knockout zebrafish; *gpx1*, glutathione peroxidase 1; *sod1*, superoxide dismutase 1, soluble; *cat1*, catalase 1; *chop*, DNA-damage-inducible transcript 3; *bcl2*, BCL2 apoptosis regulator a; *il-1*, interleukin-1; *pgc-1a*, peroxisome proliferator-activated receptor- $\gamma$  coactivator-1a; *cpt-1a*, carnitine palmitoyl transferase 1a; *atp5b*, ATP synthase 5b.

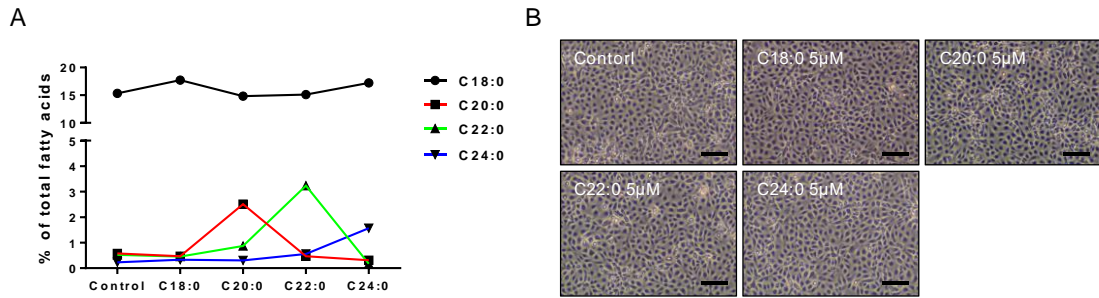

**Figure S5.** The effect of SFA treatment on zebrafish liver (ZFL) cells at 28°C, related to Figure 4. (A) The SFA compositions of ZFL cells incubated with C18-C24 SFA. (B) The proliferate status of ZFL cells with SFA treatment in 28°C, observed under light microscope. Scale bar=10µm. SFA, saturated fatty acids.

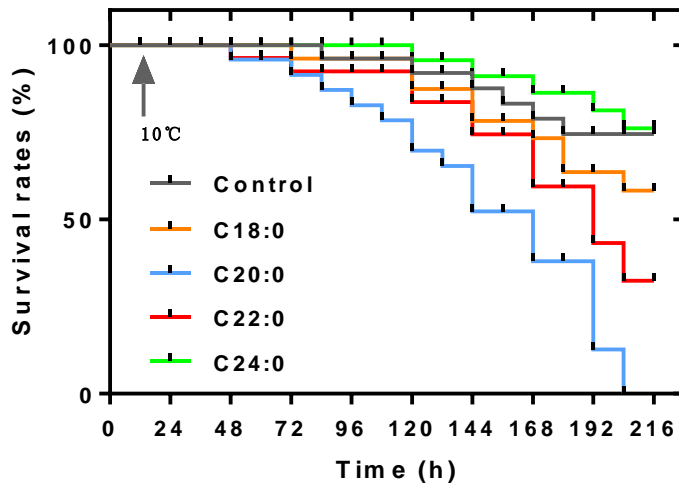

**Figure S6.** The survival rates of zebrafish during cold stress, after fed with different saturated fatty acid diets for 2 weeks, related to Figure 5.

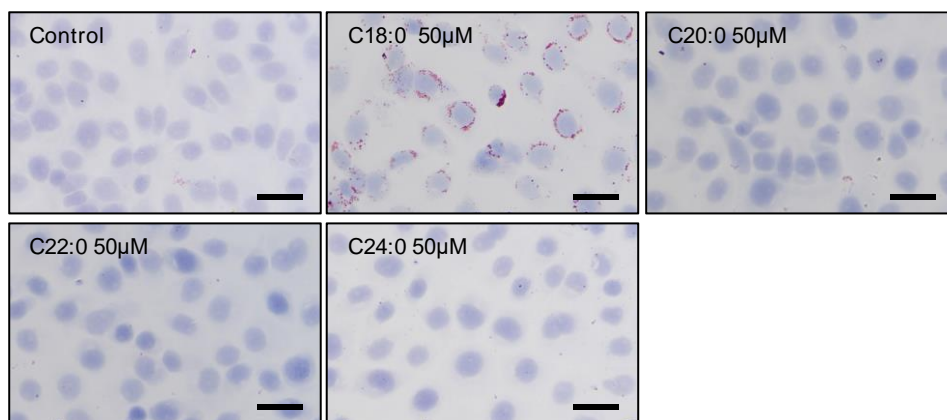

**Figure S7.** Oil red O staining of zebrafish liver (ZFL) cells incubated with C18-C24 saturated fatty acids, related to Figure 4. Scale bar=5µm.

**Table S1.** Primers used in this study, related to STAR Methods.

| Symbol                          | Forward                | Reverse                | accession      |
|---------------------------------|------------------------|------------------------|----------------|
| Construction of knockout models |                        |                        |                |
| <i>elov11a</i>                  | AGCATCAATCCGACTTAT     | TGGTTGAACTATCCCTTT     | ID: 449816     |
| <i>elov11b</i>                  | ACCGTAAACCCCTTTCAGC    | AGATGGCAAGAGTTGCTT     | ID: 406725     |
| Real-time quantitative PCR      |                        |                        |                |
| <i>β-actin</i>                  | CACCACCACAGCCGAAAGAG   | ACCGCAAGATTCCATACCCA   | AF057040.1     |
| <i>18s rRNA</i>                 | CGGCTACCACATCCAAGGAAGG | GCCCACTCCCAGATCCAACCTA | NR_145818.1    |
| <i>elov11a</i>                  | GAGACGTACGTTTGCCTCCA   | ATGGGACTCTGCATCAACGG   | NM_001005989.3 |
| <i>elov11b</i>                  | TCAGCTGAAAGAAGCCATGA   | AAGGAATGATGGAAGATGTG   | NM_213416.2    |
| <i>gpx1a</i>                    | AGGCACAACAGTCAGGGATT   | CAGGAACGCAAACAGAGGG    | NM_001007281.2 |
| <i>gpx1b</i>                    | GCGATGAGCCAATGCCGTTCA  | GATGCCGCTGGTCAGGAATCTC | NM_001004634.2 |
| <i>sod1</i>                     | GTCCGCACTTCAACCCTCA    | TCCTCATTGCCACCCTTCC    | NM_131294.1    |
| <i>cat1</i>                     | CAAGGTCTGGTCCCATAAA    | TGACTGGTAGTTGGAGGTAA   | NM_130912.2    |
| <i>caspace-3</i>                | GATCGCAGGACAGGCATGAACC | CATCGCCGTGACTGAGCAACA  | AB047003.1     |
| <i>chop</i>                     | AGCGACTGATTGGTGCATGAC  | GGTGTCTCCGTGGTTCGTTCT  | NM_001082825.1 |
| <i>bcl2</i>                     | TGTGCGTGGAAAGCGTCAACC  | TCCGATGGTCACTCCTGCCAAG | AY695820.1     |
| <i>il-1</i>                     | GGGCTCCTACCTGAACACACA  | TTGATGCGCTCCAGCTCCTCT  | NM_001290418.1 |
| <i>il-6</i>                     | CCTCAGTCCTGGTGAACGAC   | GAACAGGATCGAGTGGACCG   | NM_001261449.1 |
| <i>pgc-1a</i>                   | ATAGAGGAGAGGCGAGTG     | GTGTAGCGGTAGGTGATG     | AY998087.2     |
| <i>cpt-1a</i>                   | ATGAGGAGCACCAAAGAA     | GTGGGAAAAGCGTAAAGA     | NM_001044854.1 |
| <i>atp-5b</i>                   | TCACAACCACCAAGAAGG     | GGTACATCATAATGCTCAG    | NM_001024429.2 |
| <i>cers2a</i>                   | GACGGTGTACCTATGCCAA    | TGGTCGCTCTTGGTTCCTTC   | NM_153671.1    |
| <i>cers2b</i>                   | GAGACGGAGAGTTGCACACA   | GGCCAGTTCAGCATGTAGT    | XM_688576.7    |
| <i>cers4b</i>                   | ACAGATTGAGATCAGCGGGC   | CCCAGCAGGAAAATTGTGGC   | XM_005163643.4 |
| <i>cers6</i>                    | TCACACTAACGGGACCAACG   | GCCGCGCTCAATCTAAAAGG   | XM_688191.8    |

*elov11*, fatty acyl elongase 1; *β-actin*, beta-actin; *18s rRNA*, 18S ribosomal RNA; *gpx1*, glutathione peroxidase 1; *sod1*, superoxide dismutase 1, soluble; *cat1*, catalase 1; *chop*, DNA-damage-inducible transcript 3; *bcl2*, BCL2 apoptosis regulator a; *il-1*, interleukin-1; *pgc-1a*, peroxisome proliferator-activated receptor gamma, coactivator 1 alpha; *cpt-1a*, carnitine palmitoyltransferase 1a; *atp-5b*, ATP synthase F1 subunit beta; *cers*, ceramide synthase.
